# Supplementary material for: Structure, antimicrobial activity, albumin- and DNA-binding of manganese(ii)–sparfloxacinato complexes
Source: Royal Society of Chemistry journal article supplement (doi:10.1039/c4ra11682h), 2015-01-01
Supplement: c4ra11682h1.pdf [file c4ra11682h1.pdf]

## Structure, antimicrobial activity, albumin– and DNA–binding of manganese(II)–sparfloxacinato complexes

Marianthi Zampakou<sup>1</sup>, Sofia Balala<sup>2</sup>, Franc Perdih<sup>3</sup>, Stavros Kalogiannis<sup>2</sup>, Iztok Turel<sup>3</sup> and George Psomas<sup>1</sup>, \*

<sup>1</sup> Department of General and Inorganic Chemistry, Faculty of Chemistry, Aristotle University of Thessaloniki, GR–54124 Thessaloniki, GREECE.

<sup>2</sup> Department of Nutrition and Dietetics, Faculty of Agriculture, Food Technology and Nutrition, Alexander Technological Educational Institution, Sindos, Thessaloniki, GREECE.

<sup>3</sup> Faculty of Chemistry and Chemical Technology, University of Ljubljana, Vecna pot 113, 1000 Ljubljana, SLOVENIA.

### Supplementary material

**Table S1.** Hydrogen bonding parameters for 1·4MeOH.

| Interaction       | D–H (Å) | H···A (Å) | D···A (Å) | D–H···A (°) | Symmetry transformation for acceptors   |
|-------------------|---------|-----------|-----------|-------------|-----------------------------------------|
| N(3)–H(3A)···O(5) | 0.86    | 2.32      | 3.076(4)  | 147.4       | $-x + \frac{1}{2}, -y + \frac{1}{2}, z$ |
| N(3)–H(3B)···O(3) | 0.86    | 2.00      | 2.630(3)  | 129.5       | $x, y, z$                               |
| N(5)–H(5A)···O(2) | 0.92(3) | 2.21(3)   | 3.126(3)  | 173(2)      | $-x + \frac{1}{2}, y, z + \frac{1}{2}$  |
| O(4)–H(4)···N(5)  | 0.82    | 2.03      | 2.830(4)  | 165.7       | $x, y, z$                               |
| O(5)–H(5)···O(2)  | 0.82    | 1.93      | 2.739(3)  | 169.5       | $x, y, z$                               |

\* Corresponding author:

Tel.:+30+2310997790; Fax:+30+2310997738; E–mail: gepsomas@chem.auth.gr

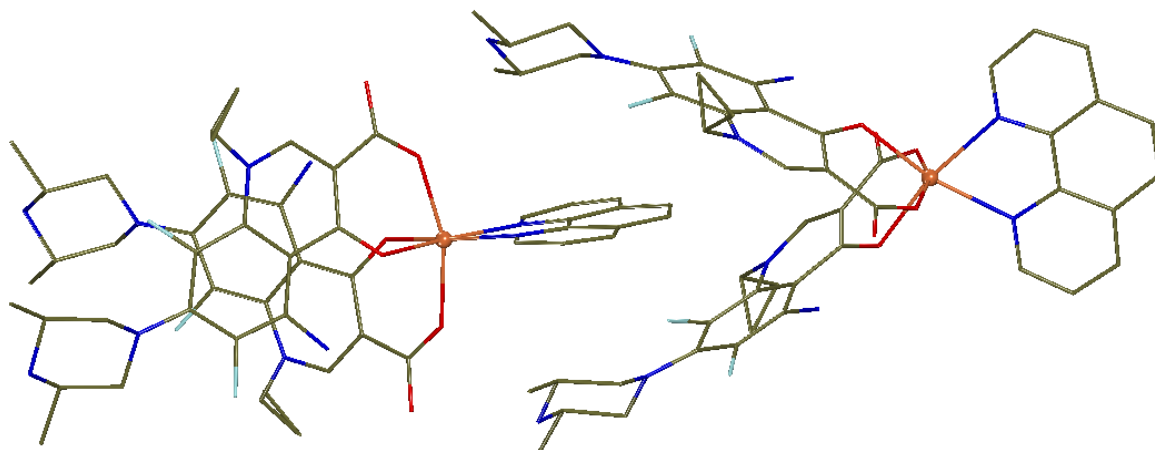

**Figure S1.** Interaction of guest–host molecules in **1**. Mn in orange, O in red, N in blue, C in dark yellow and F in light blue.

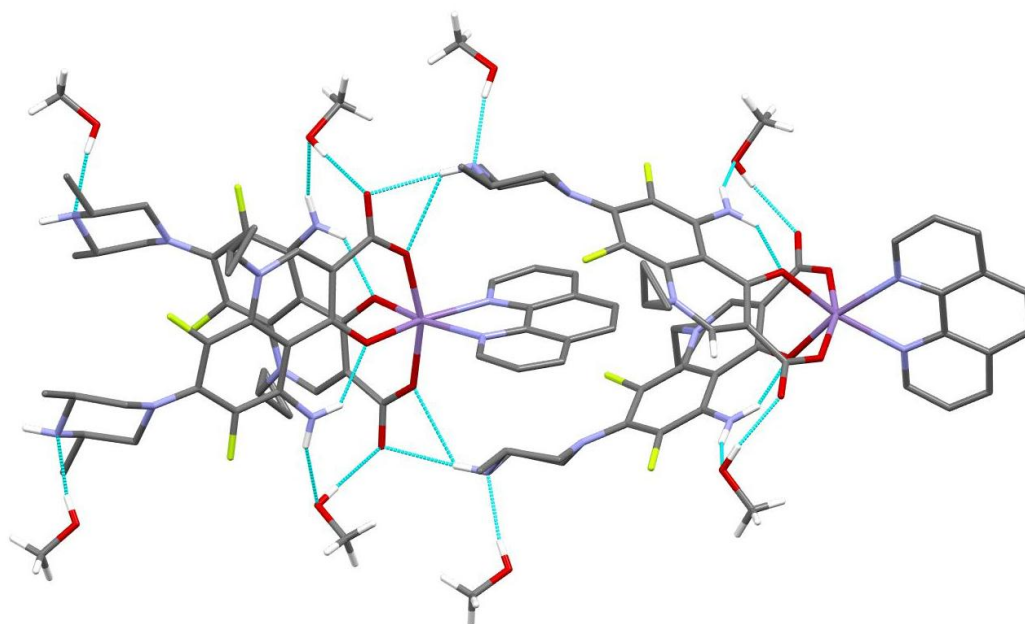

(A)

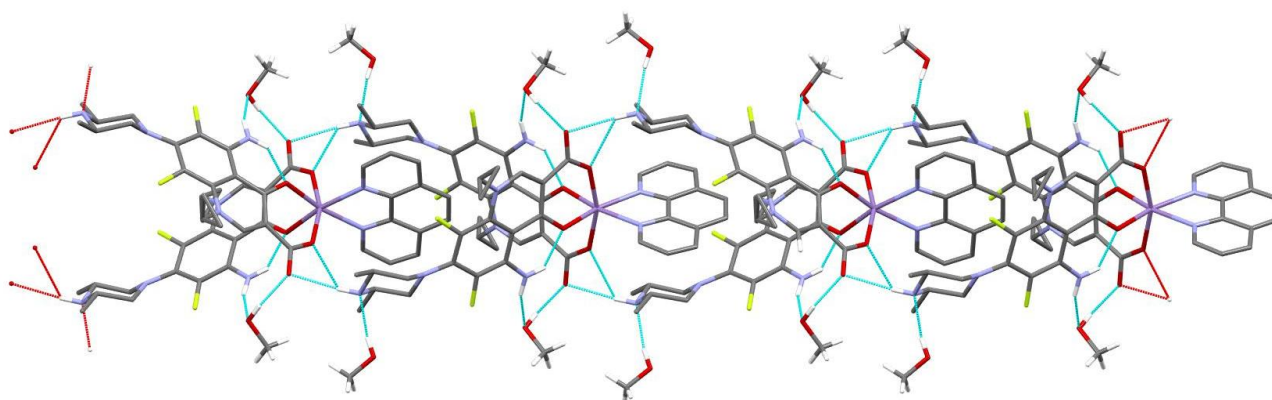

(B)

**Figure S2.** (A) Hydrogen bonding in 1:4MeOH, (B) chain formation. Hydrogen atoms not involved in the motif shown have been omitted for clarity.

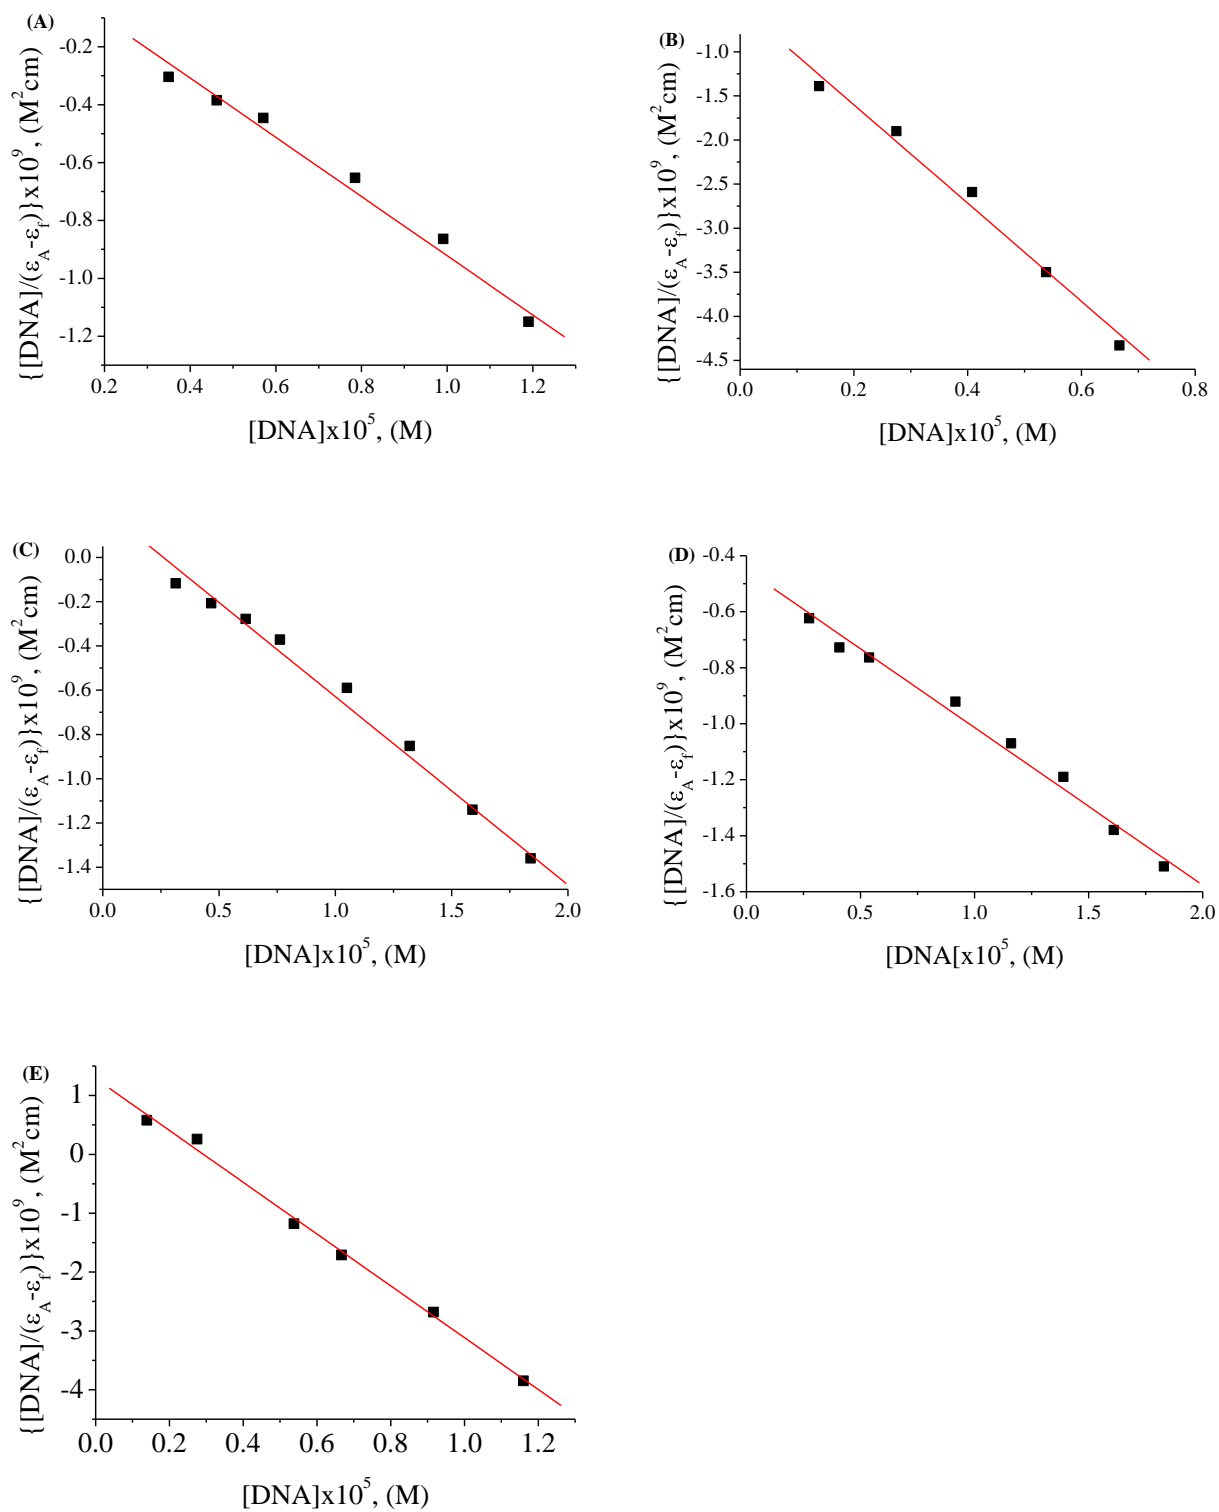

**Figure S3.** (A)–(E) Plot of  $\frac{[\text{DNA}]}{(\epsilon_A - \epsilon_f)}$  vs  $[\text{DNA}]$  for complexes 1–5, respectively.

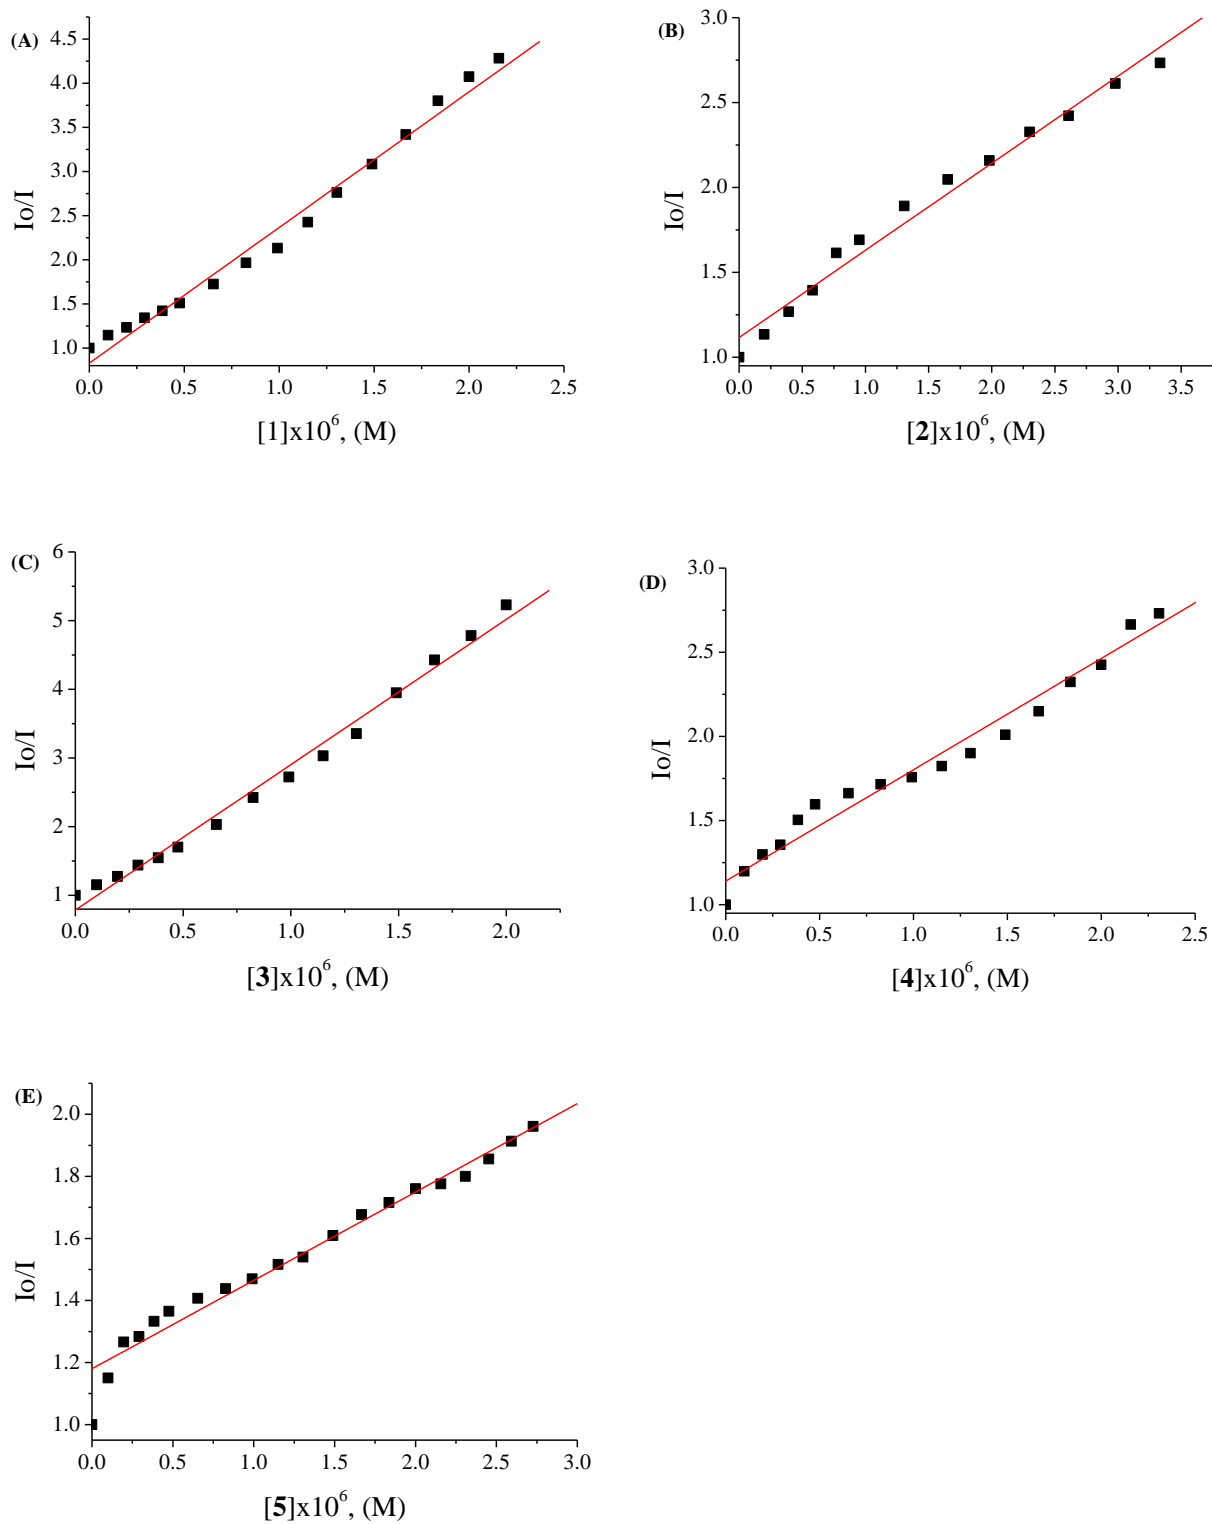

**Figure S4.** (A)–(E) Stern–Volmer quenching plot of EB bound to CT DNA for complexes 1–5, respectively.

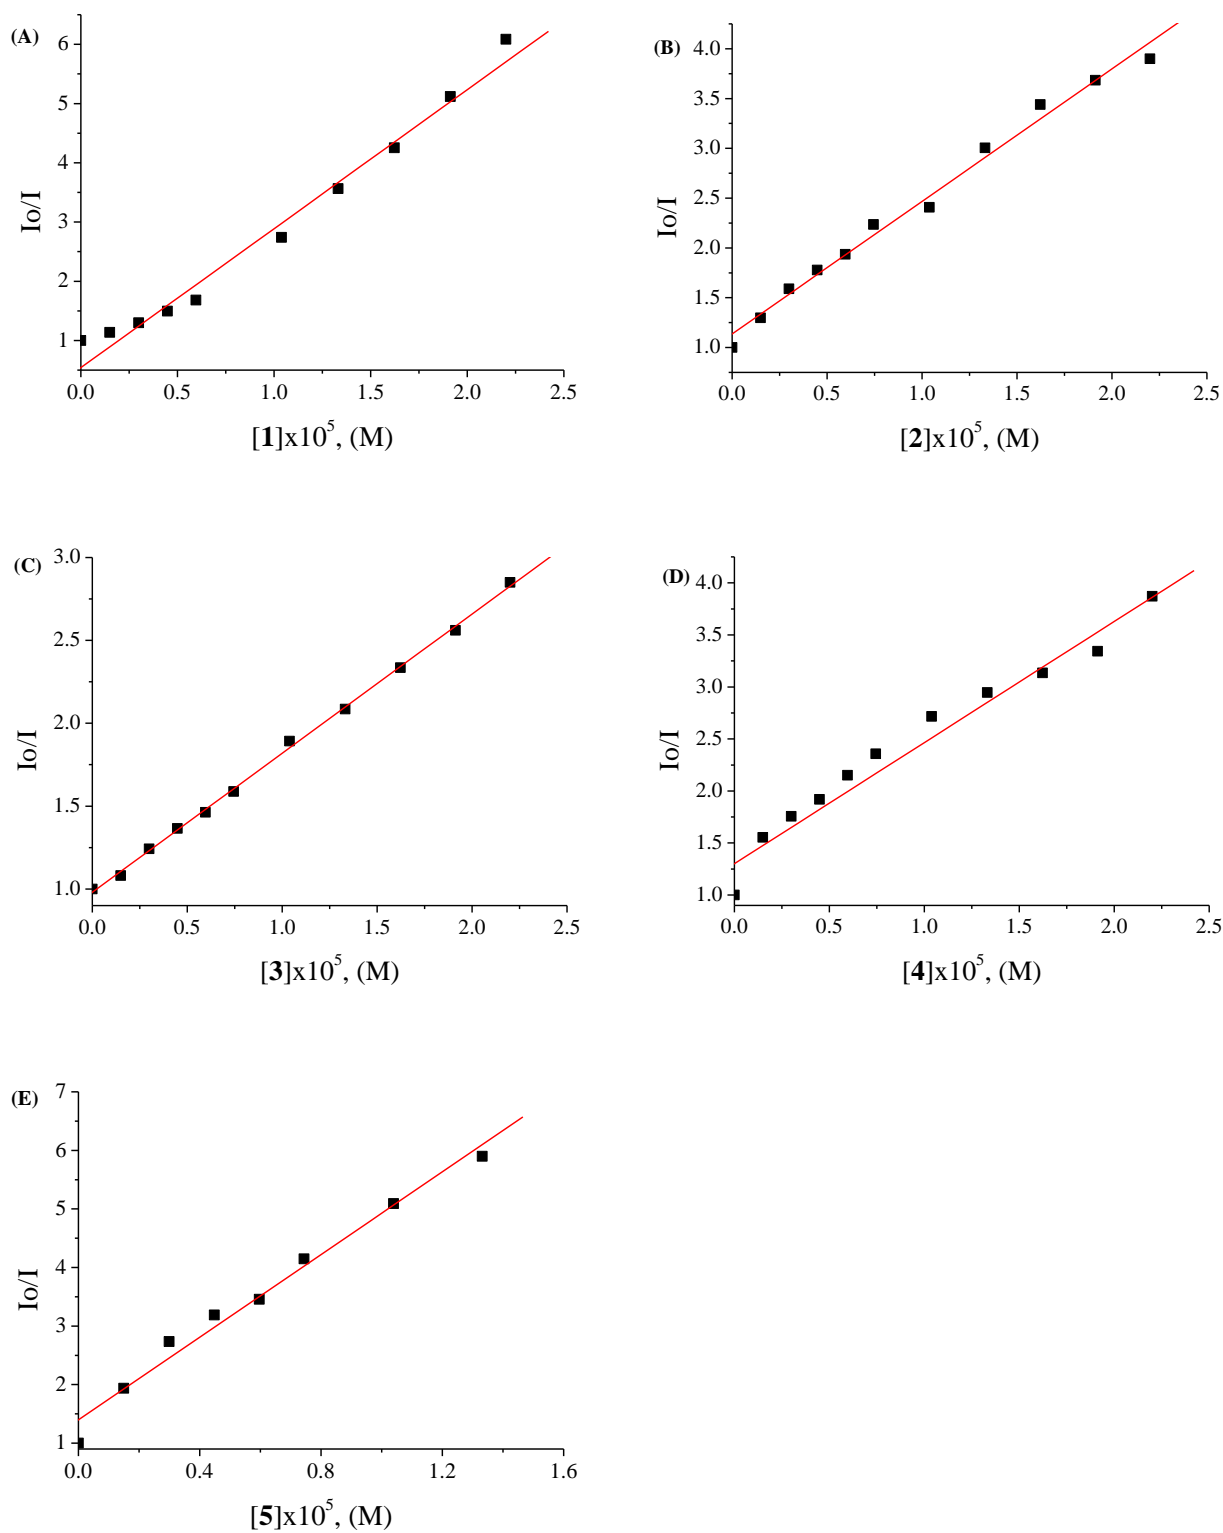

**Figure S5.** (A)–(E) Stern–Volmer quenching plot of HSA for complexes 1–5, respectively.

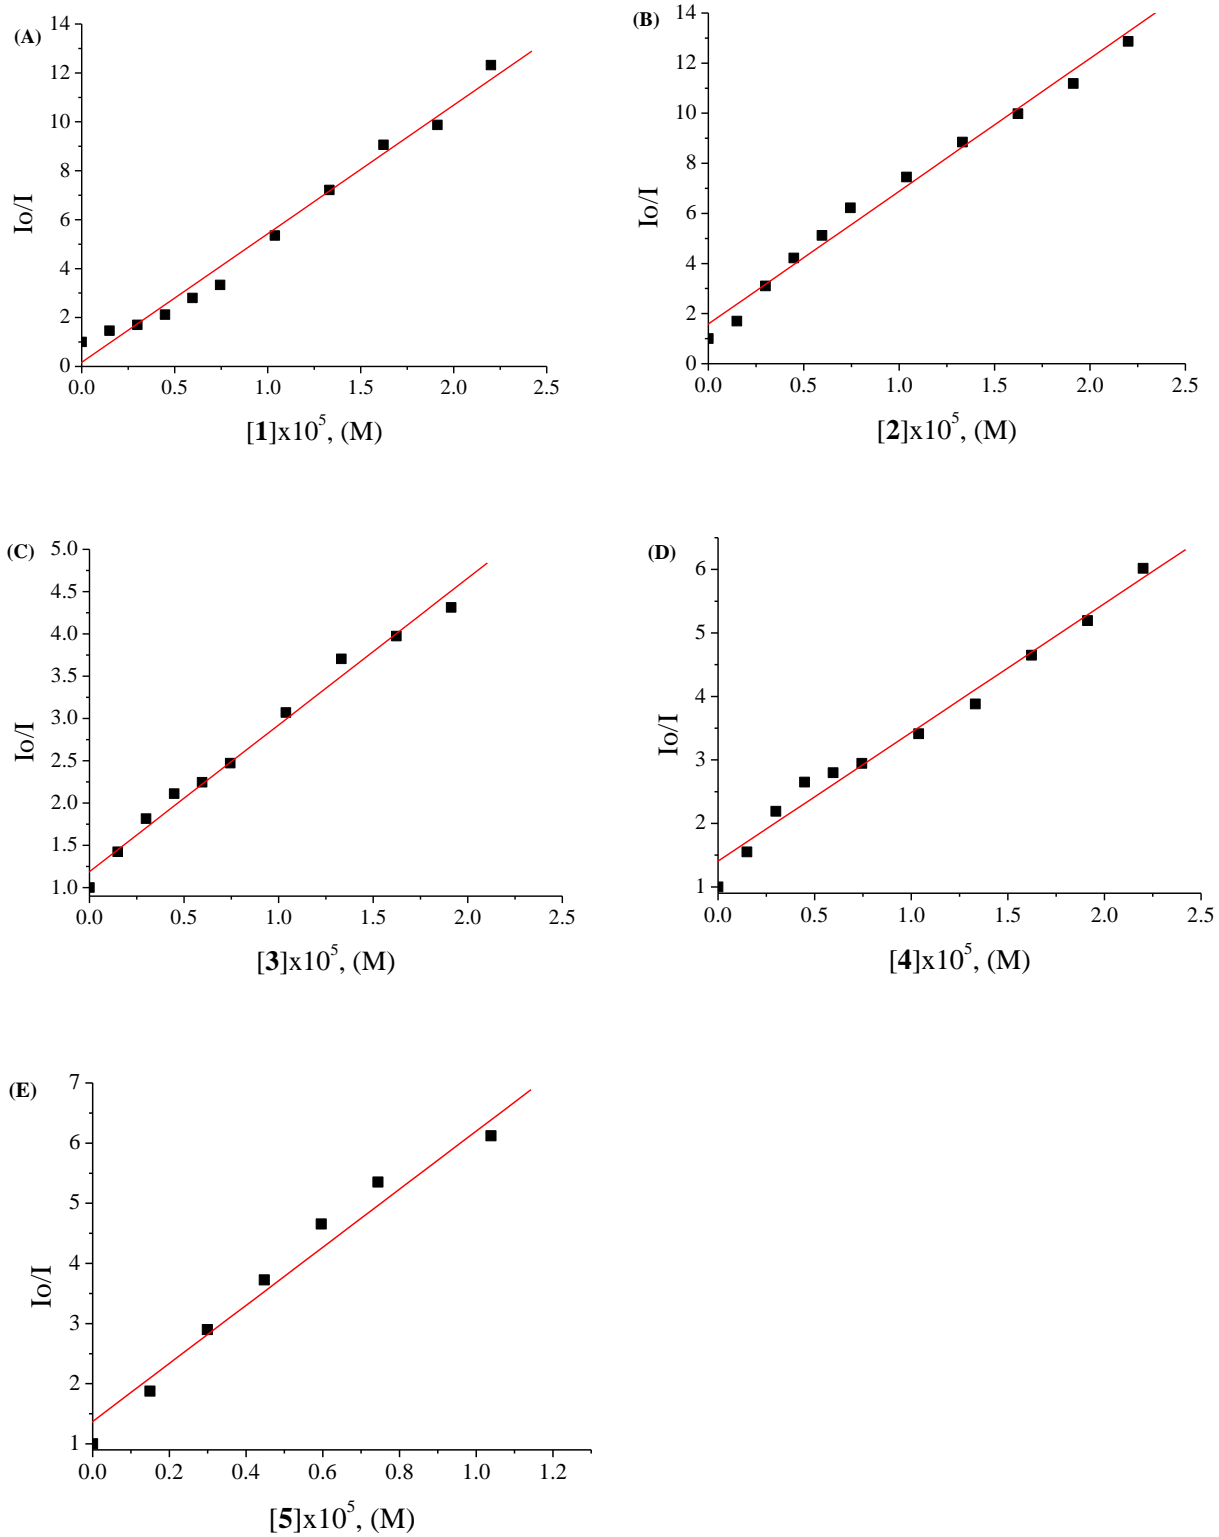

**Figure S6.** (A)–(E) Stern–Volmer quenching plot of BSA for complexes 1–5, respectively.

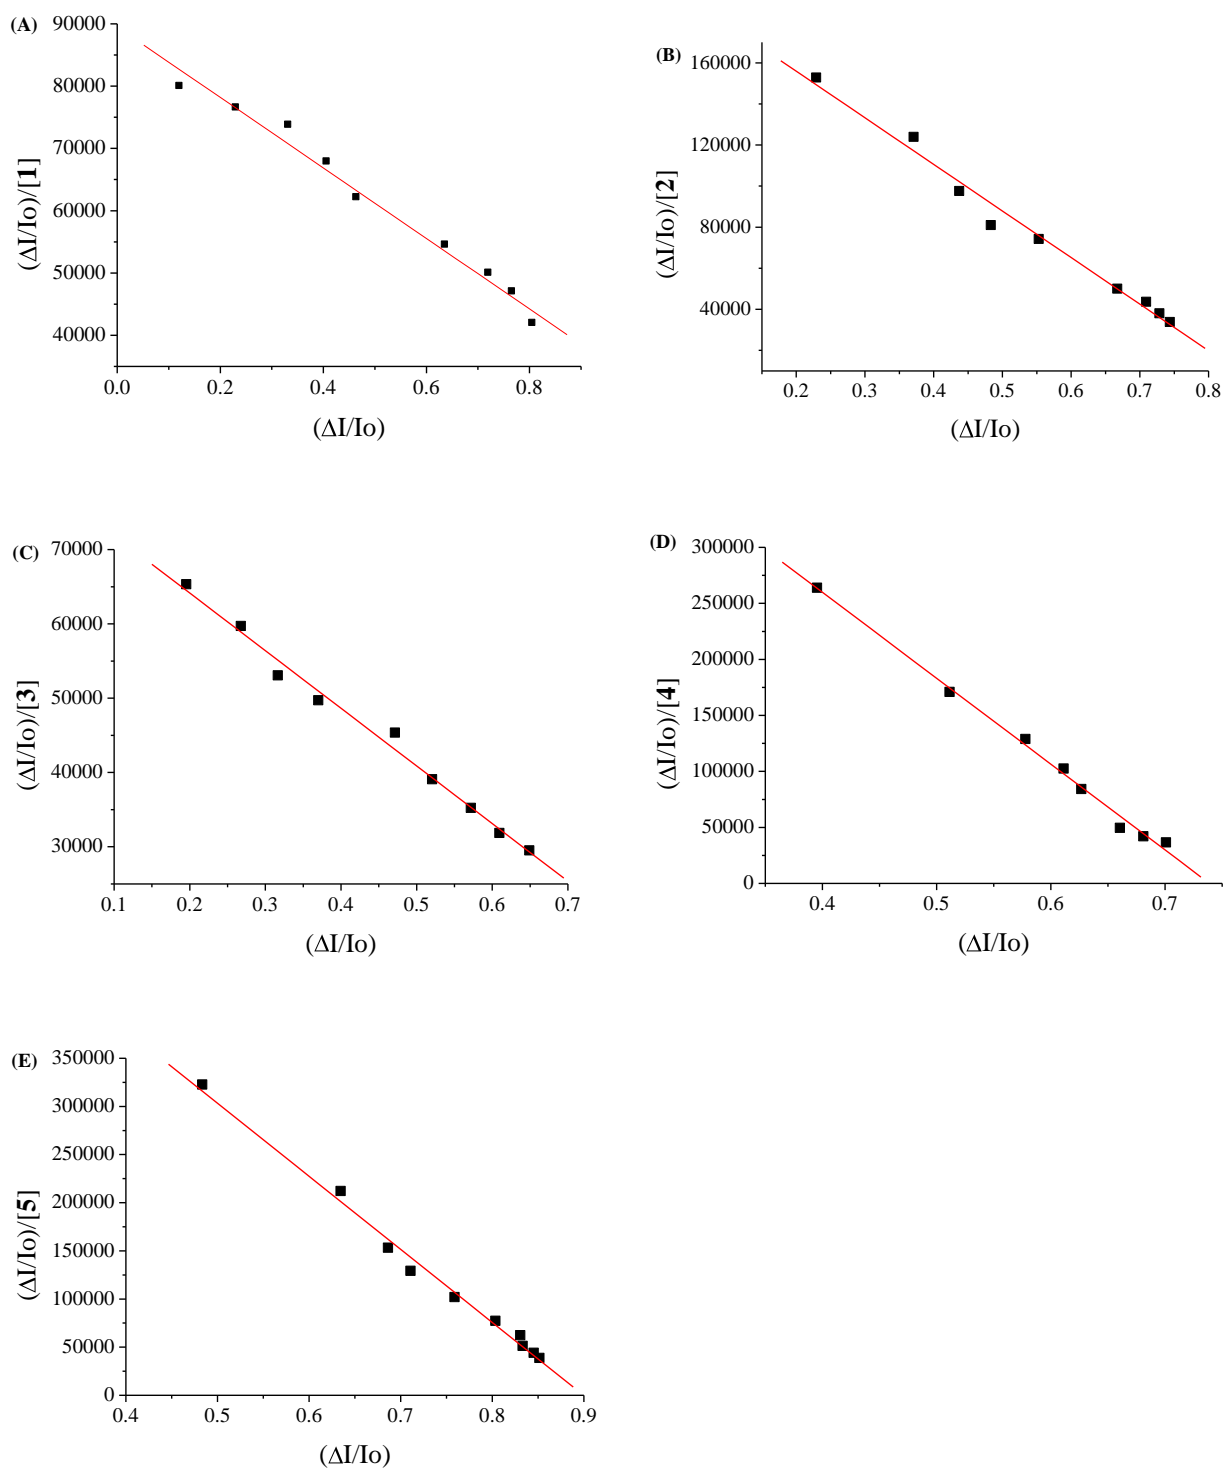

**Figure S7.** (A)–(E) Scatchard plot of HSA for complexes 1–5, respectively.



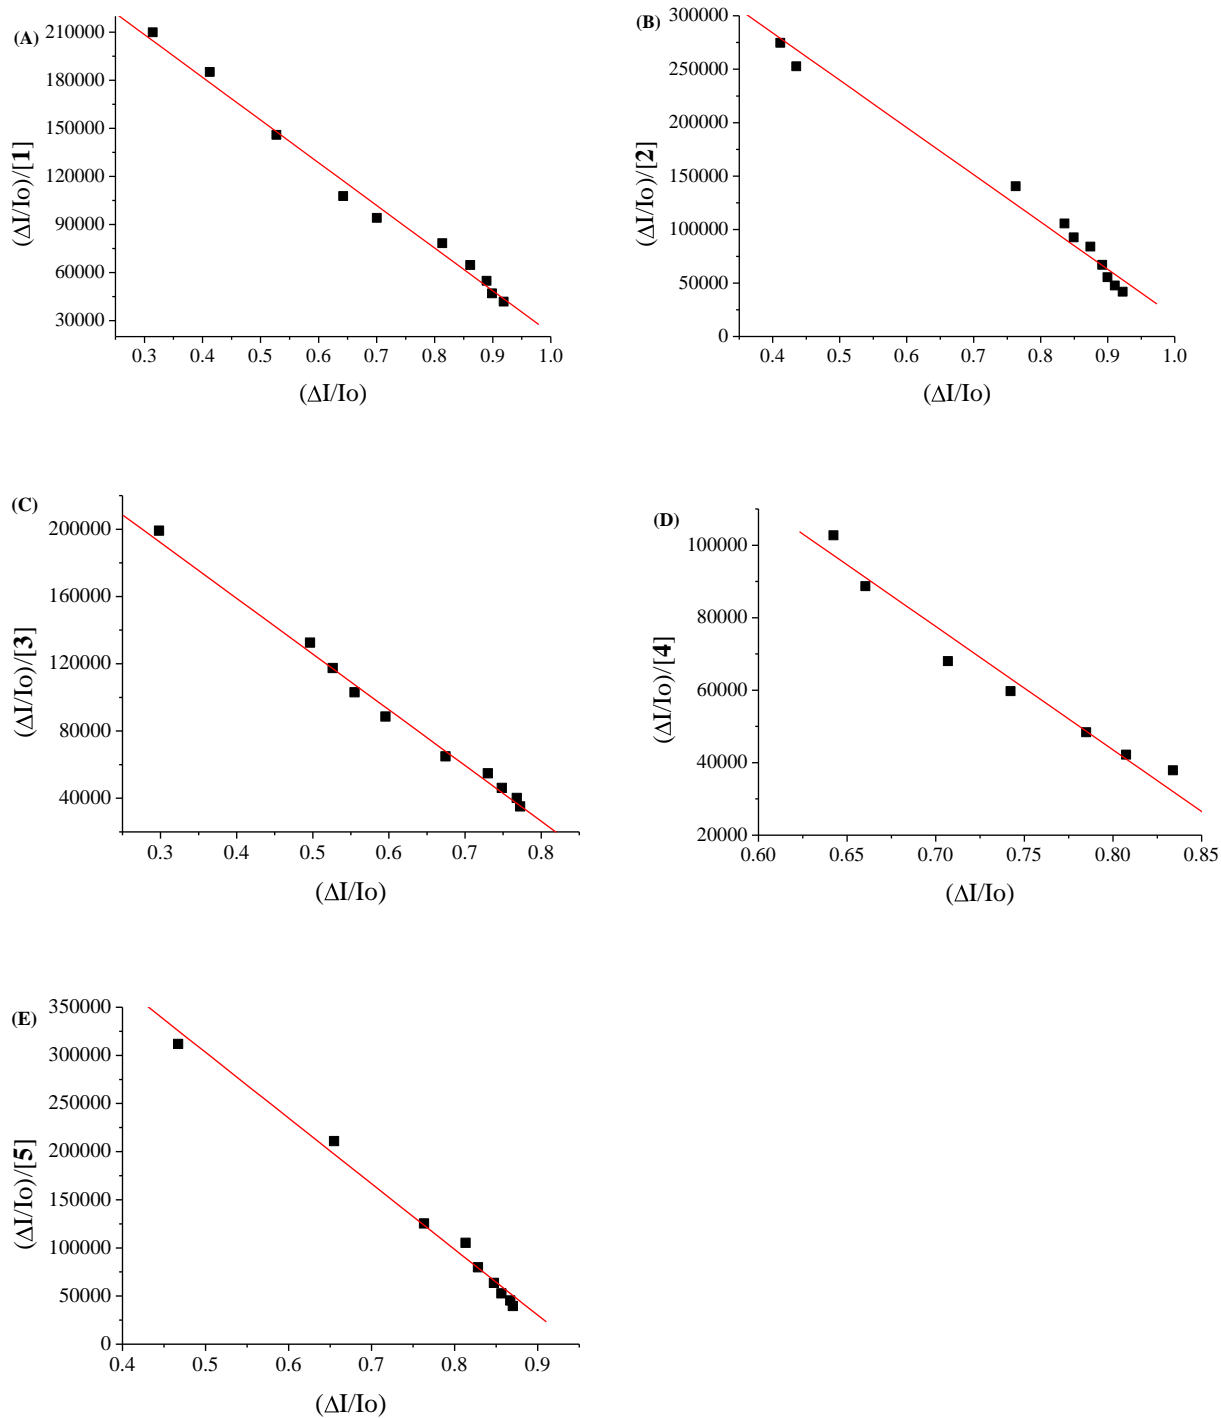

**Figure S8.** (A)–(E) Scatchard plot of BSA for complexes 1–5, respectively.
